# Supplementary material for: Mathematical Modelling to Assess the Impact of Lockdown on COVID-19 Transmission in India: Model Development and Validation
Source: PubMed Central journal article supplement (PMC7207014; doi:10.2196/19368), 2020-05-07
Supplement: publichealth_v6i2e19368_app1.pdf [file publichealth_v6i2e19368_app1.pdf]

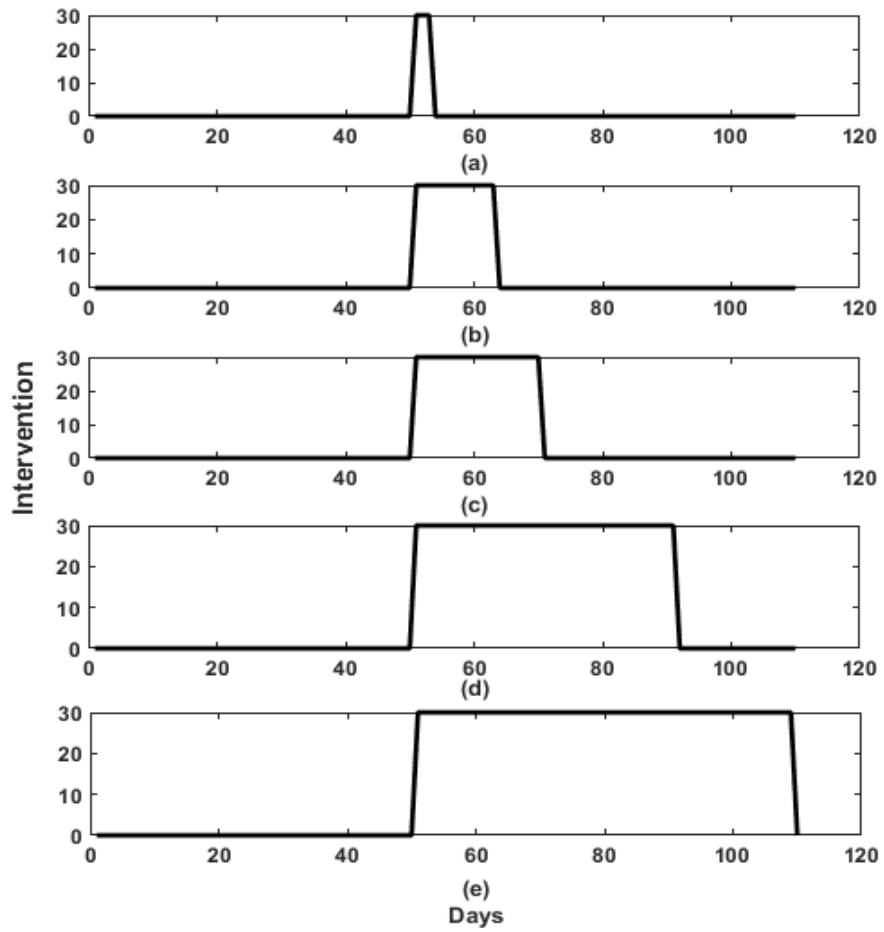

**Figure S1. The considered intervention periods of (a) 4 days, (b) 14 days, (c) 21 days, (d) 42 days and (e) 60 days**
