# Supplementary material for: Mathematical Modelling to Assess the Impact of Lockdown on COVID-19 Transmission in India: Model Development and Validation
Source: PubMed Central journal article supplement (PMC7207014; doi:10.2196/19368), 2020-05-07
Supplement: publichealth_v6i2e19368_app2.pdf [file publichealth_v6i2e19368_app2.pdf]

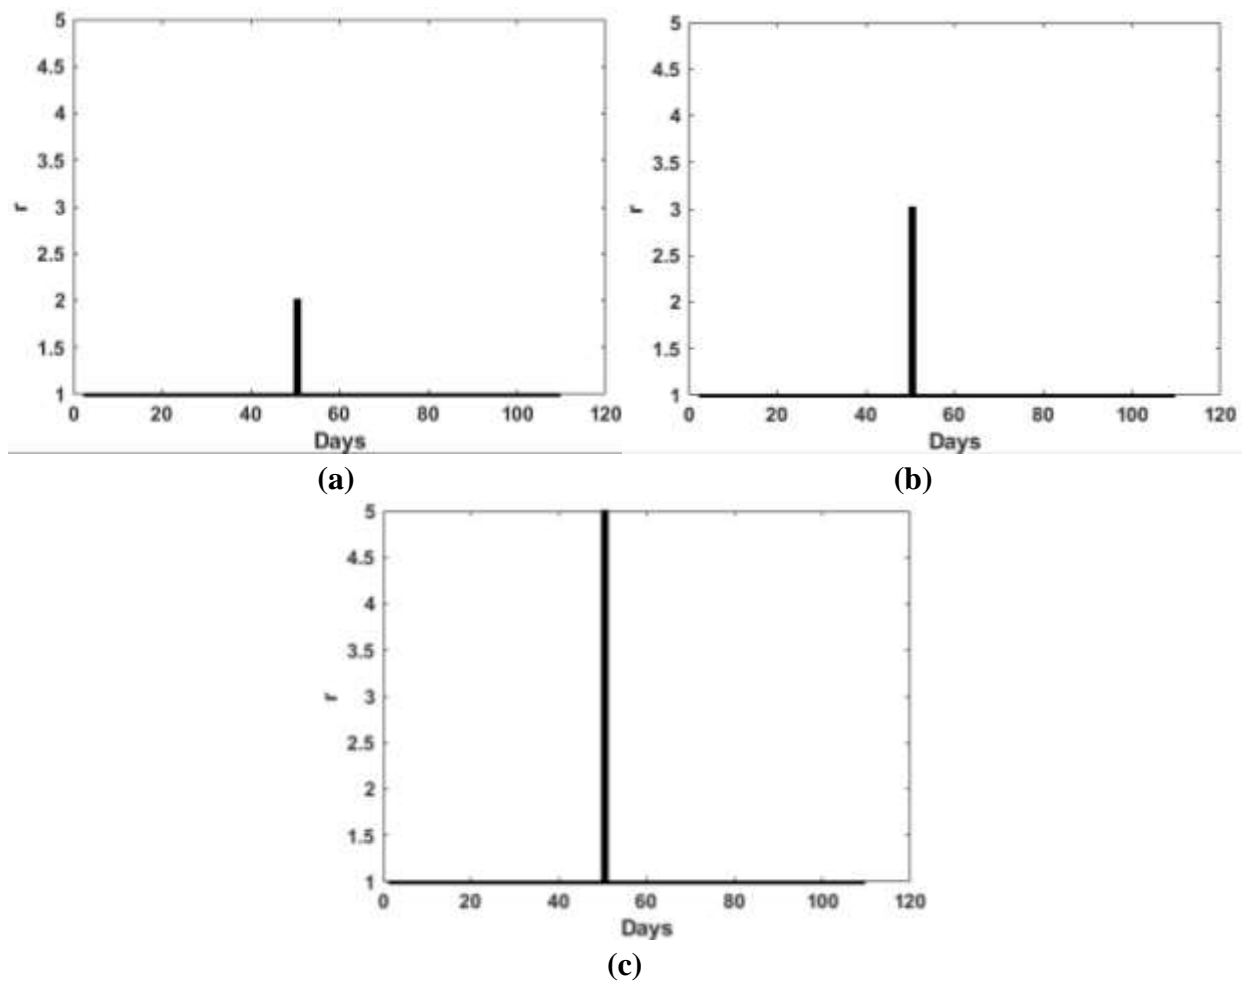

**Figure S2. Three different scenarios with increase in infection dynamics by factors of (a) 2, (b) 3 and (c) 5 on the day before the start of travel intervention**
