# Supplementary material for: Mathematical Modelling to Assess the Impact of Lockdown on COVID-19 Transmission in India: Model Development and Validation
Source: PubMed Central journal article supplement (PMC7207014; doi:10.2196/19368), 2020-05-07
Supplement: publichealth_v6i2e19368_app3.pdf [file publichealth_v6i2e19368_app3.pdf]

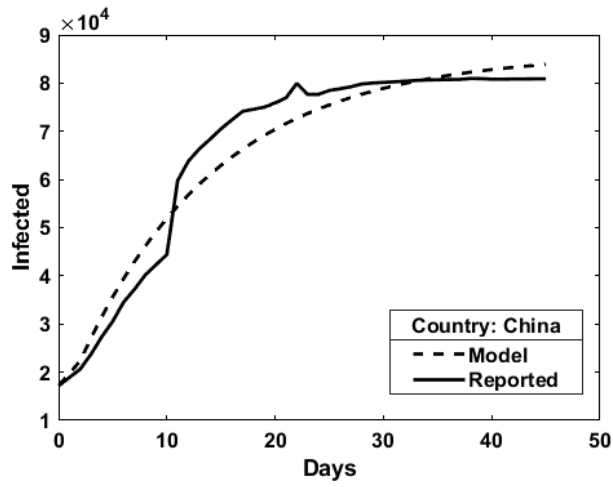

(a)

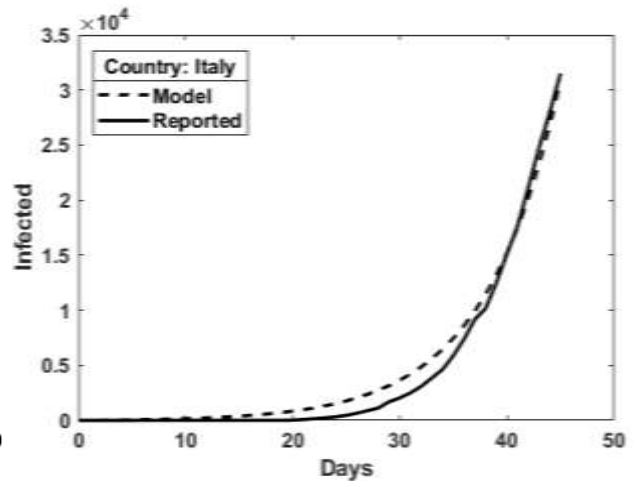

(b)

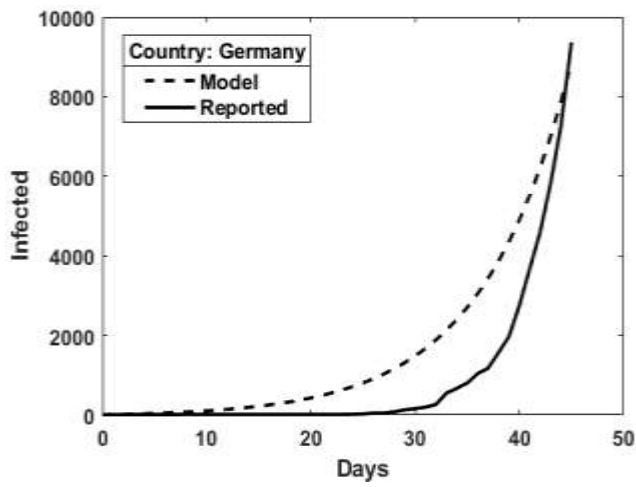

(c)

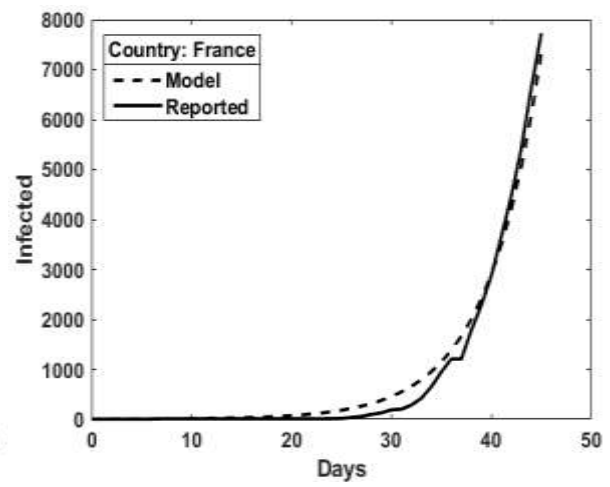

(d)

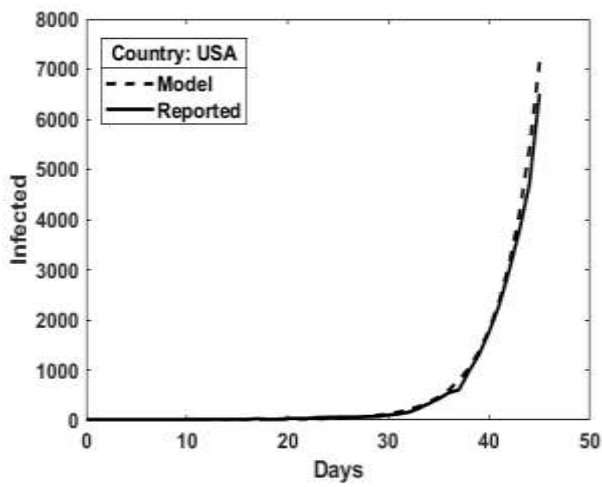

(e)

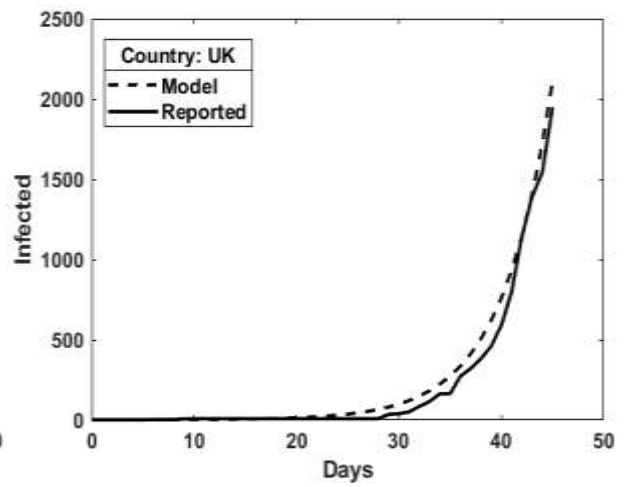

(f)

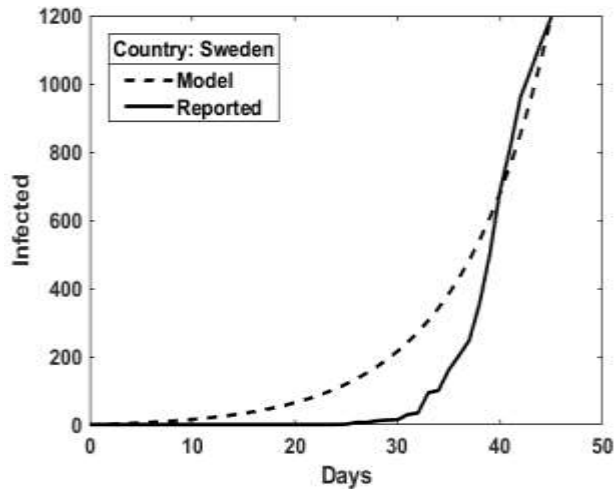

(g)

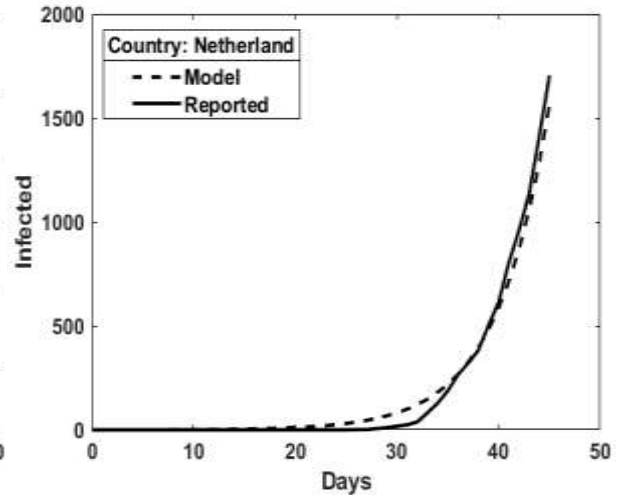

(h)

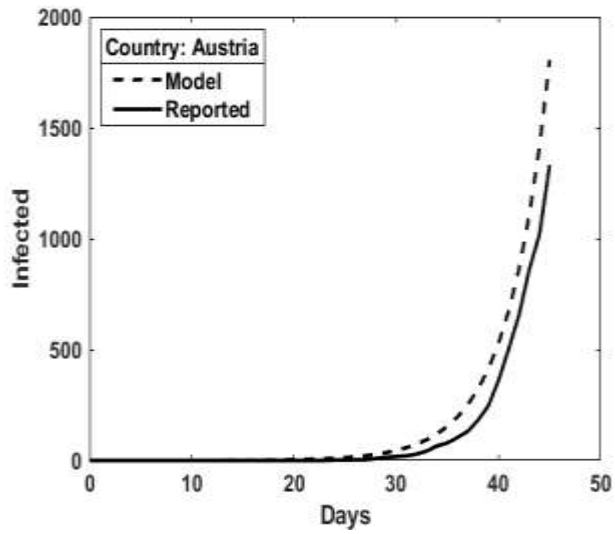

(i)

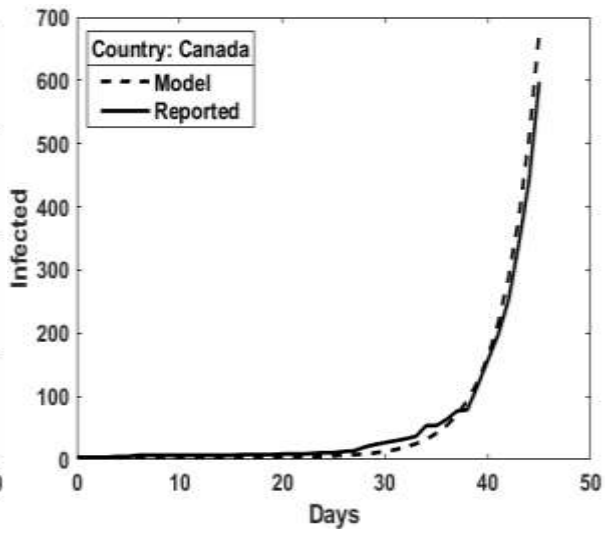

(j)

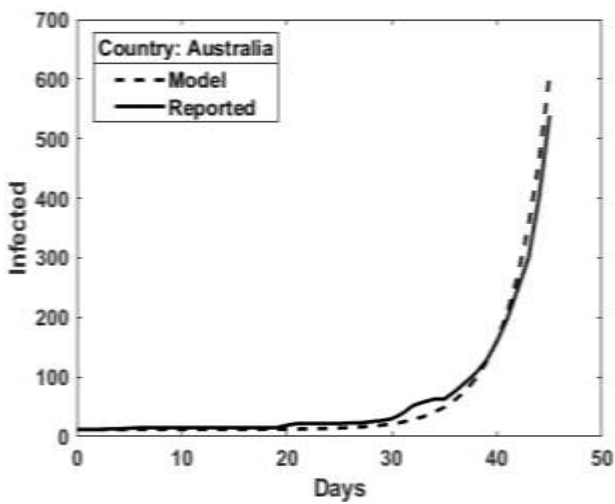

(k)

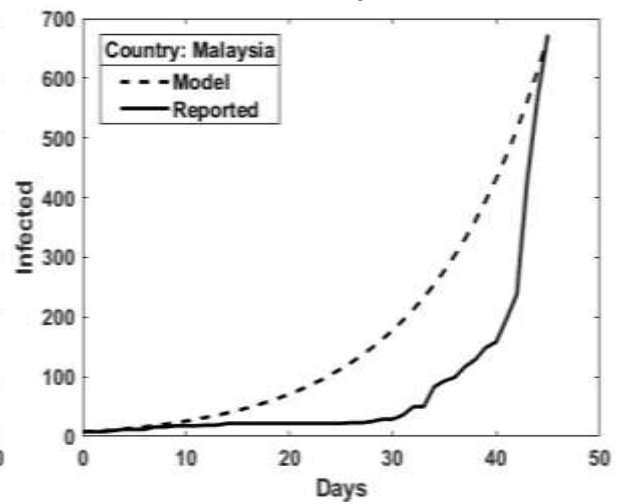

(l)

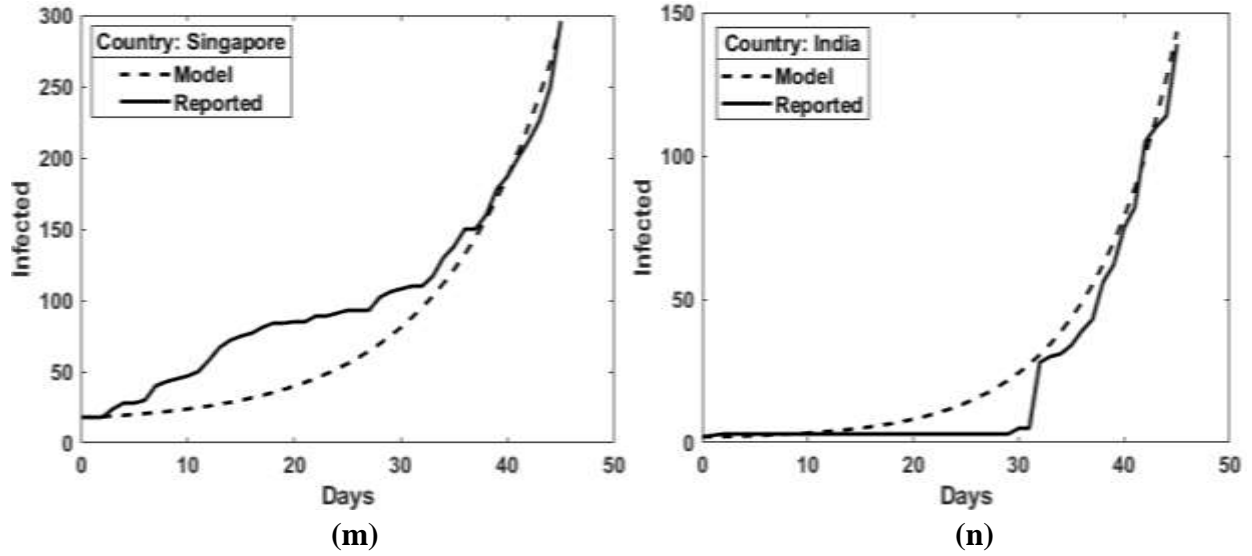

**Figure S3. The Infected population predicted using the developed model and the actual reported cases in (a) China, (b) Italy, (c) Germany, (d) France, (e) USA, (f) UK, (g) Sweden, (h) Netherland, (i) Austria, (j) Canada, (k) Australia, (l) Malaysia, (m) Singapore and (n) India (Day 0: 2<sup>nd</sup> February 2020)**
