# Supplementary material for: Mathematical Modelling to Assess the Impact of Lockdown on COVID-19 Transmission in India: Model Development and Validation
Source: PubMed Central journal article supplement (PMC7207014; doi:10.2196/19368), 2020-05-07
Supplement: publichealth_v6i2e19368_app4.pdf [file publichealth_v6i2e19368_app4.pdf]

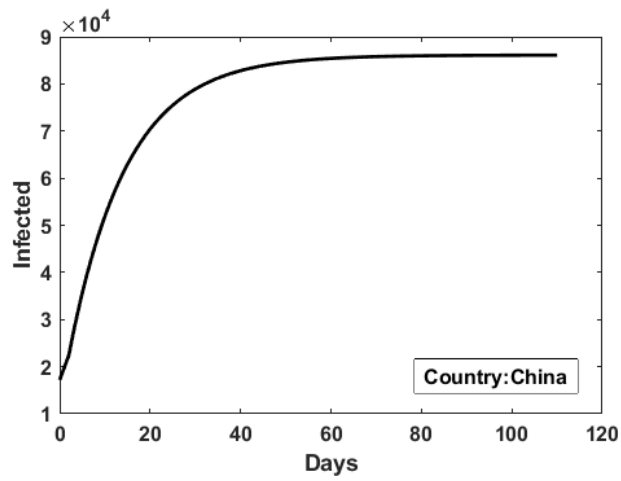

(a)

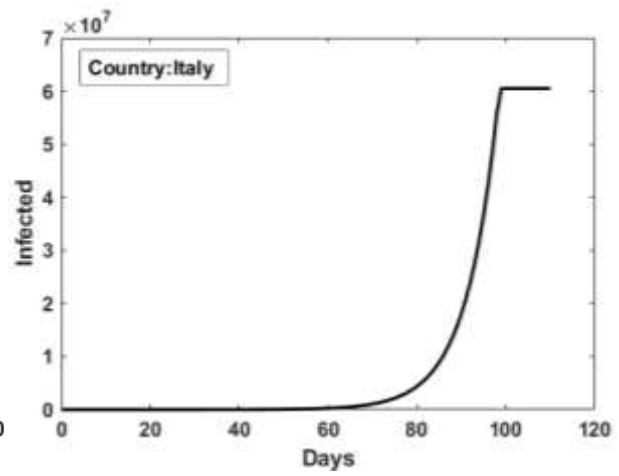

(b)

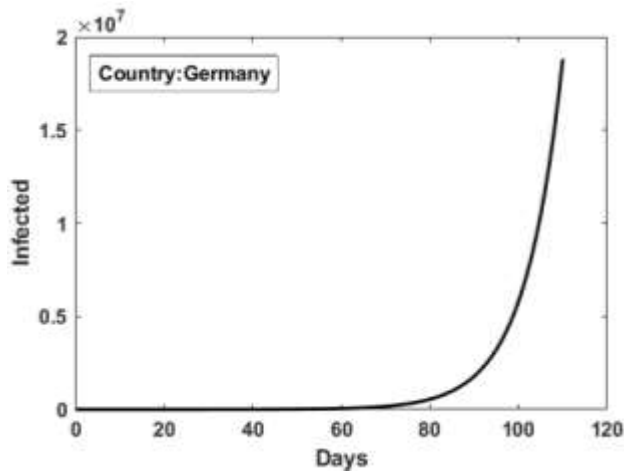

(c)

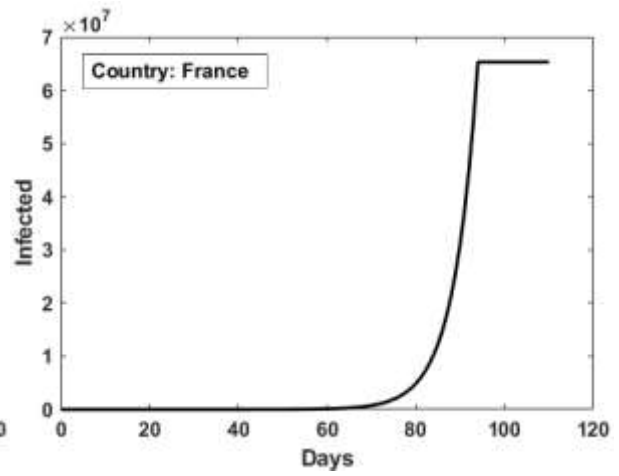

(d)

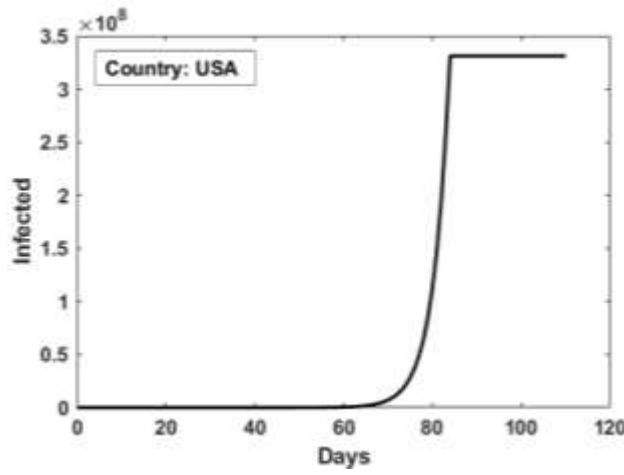

(e)

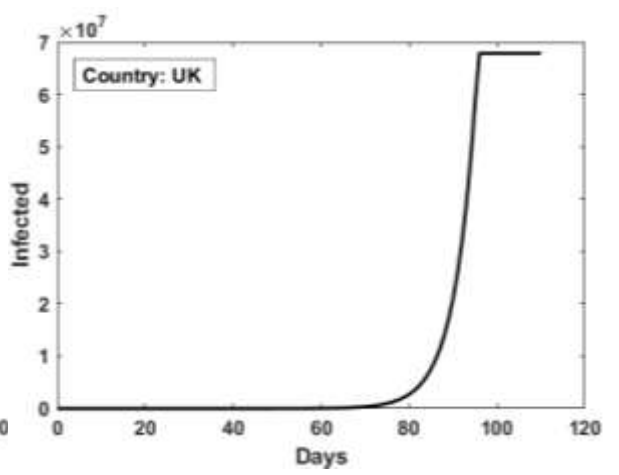

(f)

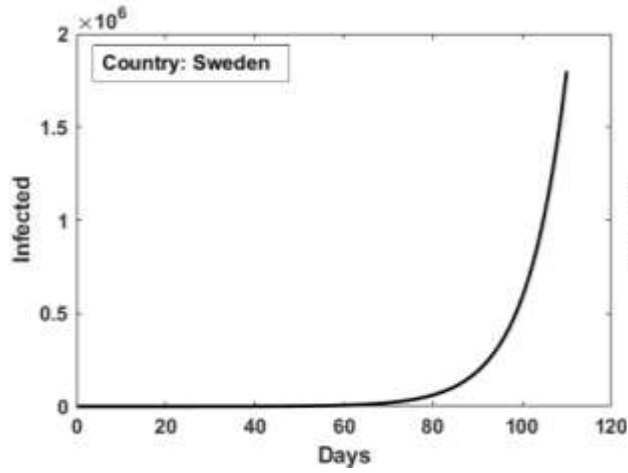

(g)

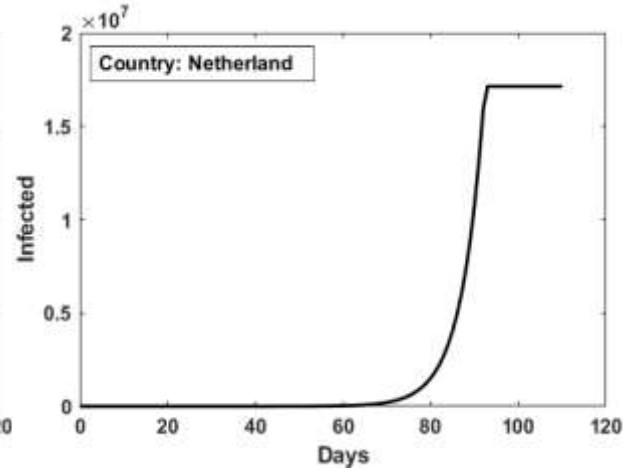

(h)

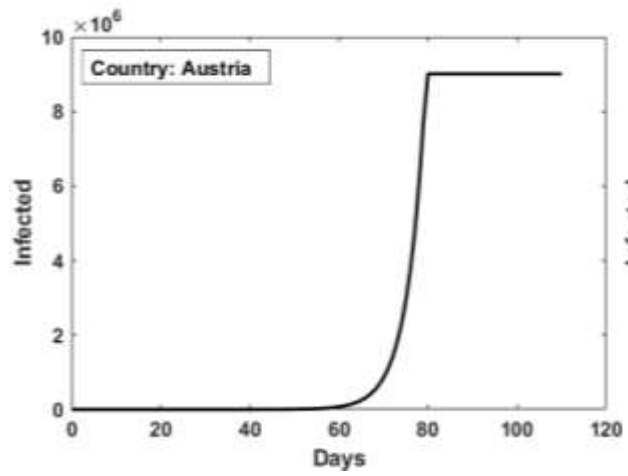

(i)

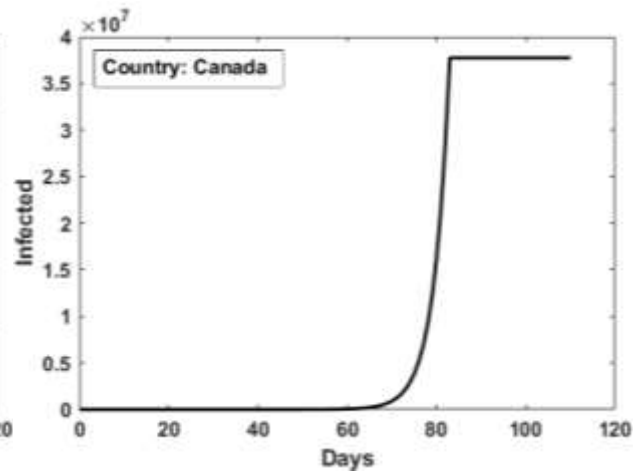

(j)

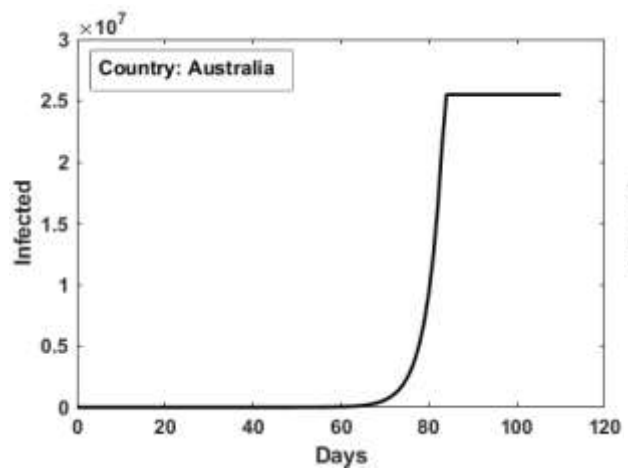

(k)

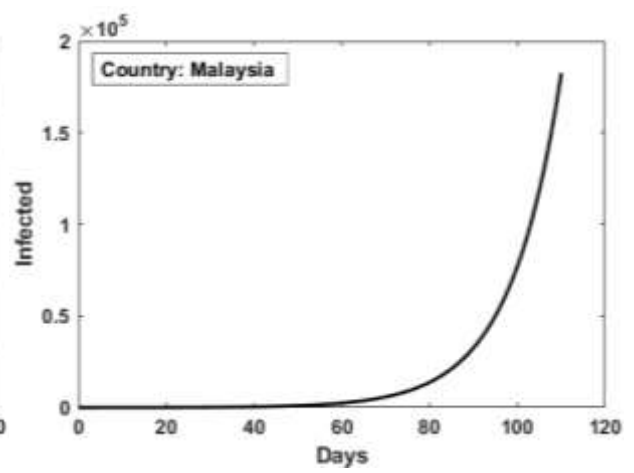

(l)

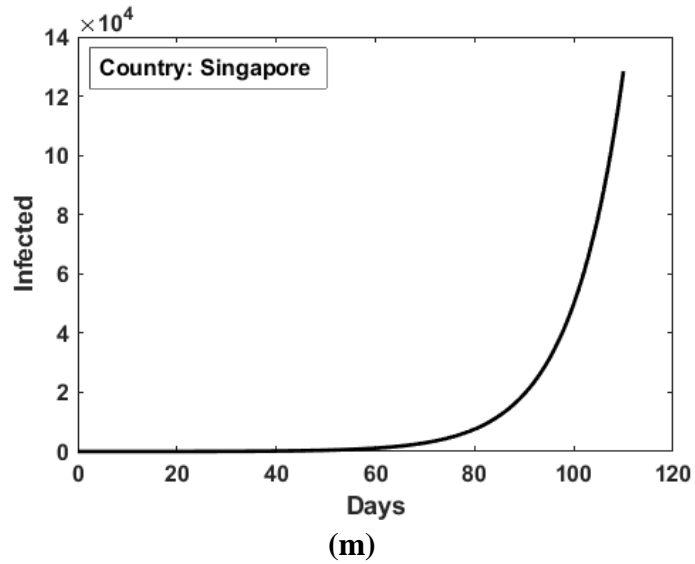

**Figure S4. The Infected population predicted using the developed model for (a) China, (b) Italy, (c) Germany, (d) France, (e) USA, (f) UK, (g) Sweden, (h) Netherland, (i) Austria, (j) Canada, (k) Australia, (l) Malaysia and (m) Singapore, without intervention. (Day 0: 2<sup>nd</sup> February 2020)**
